# Supplementary material for: Associations of Tumor Necrosis Factor-Alpha Gene Polymorphisms (TNF)-α TNF-863A/C (rs1800630), TNF-308A/G (rs1800629), TNF-238A/G (rs361525), and TNF-Alpha Serum Concentration with Age-Related Macular Degeneration
Source: MDPI journal article supplement (doi:10.3390/life12070928), 2022-06-21
Supplement: s1 [file s1]

## Supplementary Materials

**Table S1.** Genotypes distribution of *TNF- $\alpha$*  SNPs in the control group using the Hardy-Weinberg equilibrium.

| SNP                    | Group   | Allele frequency |           | Distribution of Genotypes | HWE <i>p</i> -Value |
|------------------------|---------|------------------|-----------|---------------------------|---------------------|
| TNF-863A/C (rs1800630) | Control | A (0.151)        | C (0.849) | 10/87/258                 | 645                 |
| TNF-308A/G (rs1800629) | Control | A (0.115)        | G (0.885) | 4/74/277                  | 146                 |
| TNF-238A/G (rs361525)  | Control | A (0.056)        | G (0.944) | 1/38/316                  | 16                  |

SNP: single nucleotide polymorphism; HWE: Hardy-Weinberg equilibrium; *p*-value: significance level.

**Table S2.** Distributions of rs1800630, rs1800629, rs361525 genotypes and alleles in patients with early AMD and control groups.

| SNP                    | Genotypes/<br>Alleles | Group                               |                                     | <i>p</i> -Value |
|------------------------|-----------------------|-------------------------------------|-------------------------------------|-----------------|
|                        |                       | Control<br>n (%)<br>(n = 355)       | Early AMD<br>n (%)<br>(n = 330)     |                 |
| TNF-863A/C (rs1800630) | CC<br>AC<br>AA        | 258 (72.7)<br>87 (24.5)<br>10 (2.8) | 235 (71.2)<br>81 (24.5)<br>14 (4.2) | 0.594           |
|                        | C<br>A                | 603 (84.9)<br>107 (15.1)            | 551 (83.5)<br>109 (16.5)            | 0.463           |
| TNF-308A/G (rs1800629) | GG<br>AG<br>AA        | 277 (78.0)<br>74 (20.8)<br>4 (1.1)  | 267 (80.9)<br>56 (17.0)<br>7 (2.1)  | 0.275           |
|                        | G<br>A                | 628 (88.5)<br>82 (11.5)             | 590 (89.4)<br>70 (10.6)             | 0.579           |
| TNF-238A/G (rs361525)  | GG<br>AG<br>AA        | 316 (89.0)<br>38 (10.7)<br>1 (0.3)  | 303 (91.8)<br>27 (8.2)<br>0 (0.0)   | 0.329           |
|                        | G<br>A                | 670 (94.4)<br>40 (5.6)              | 633 (95.9)<br>27 (4.1)              | 0.186           |

SNP: single nucleotide polymorphism; AMD: age-related macular degeneration; *p*-value: significance level (statistically significant when  $p < 0.05$ ).

**Table S3.** Distributions of rs1800630, rs1800629, rs361525 genotypes and alleles in patients with early and exudative AMD.

| SNP                       | Genotypes/<br>Alleles | Group                           |                                     | <i>p</i> -Value |
|---------------------------|-----------------------|---------------------------------|-------------------------------------|-----------------|
|                           |                       | Early AMD<br>n (%)<br>(n = 330) | Exudative AMD<br>n (%)<br>(n = 393) |                 |
| TNF-863A/C<br>(rs1800630) | CC                    | 235 (71.2)                      | 263 (66.9)                          | 0.420           |
|                           | AC                    | 81 (24.5)                       | 108 (27.5)                          |                 |
|                           | AA                    | 14 (4.2)                        | 22 (5.6)                            |                 |
|                           | C                     | 551 (83.5)                      | 634 (80.7)                          | 0.164           |
|                           | A                     | 109 (16.5)                      | 152 (19.3)                          |                 |
|                           |                       |                                 |                                     |                 |
| TNF-308A/G<br>(rs1800629) | GG                    | 267 (80.9)                      | 297 (75.6)                          | 0.090           |
|                           | AG                    | 56 (17.0)                       | 91 (23.2)                           |                 |
|                           | AA                    | 7 (2.1)                         | 5 (1.3)                             |                 |
|                           | G                     | 590 (89.4)                      | 685 (87.2)                          | 0.188           |
|                           | A                     | 70 (10.6)                       | 101 (12.8)                          |                 |
|                           |                       |                                 |                                     |                 |
| TNF-238A/G<br>(rs361525)  | GG                    | 303 (91.8)                      | 361 (91.9)                          | 0.417           |
|                           | AG                    | 27 (8.2)                        | 30 (7.6)                            |                 |
|                           | AA                    | 0 (0.0)                         | 2 (0.5)                             |                 |
|                           | G                     | 633 (95.9)                      | 752 (95.7)                          | 0.825           |
|                           | A                     | 27 (4.1)                        | 34 (4.3)                            |                 |
|                           |                       |                                 |                                     |                 |

SNP: single nucleotide polymorphism; AMD: age-related macular degeneration; *p*-value: significance level (statistically significant when  $p < 0.05$ ).

**Table S4.** Binary logistic regression analysis of rs1800630, rs1800629, rs361525 in patients with early AMD and control groups.

| Model                  | Genotype/Allele | OR (95% CI)         | <i>p</i> -Value | AIC     |
|------------------------|-----------------|---------------------|-----------------|---------|
| TNF-863A/C (rs1800630) |                 |                     |                 |         |
| Additive               | A               | 1.106 (0.836–1.464) | 0.480           | 950.200 |
| Codominant             | A/C             | 1.022 (0.720–1.451) | 0.902           | 951.654 |
|                        | A/A             | 1.537 (0.670–3.527) | 0.310           |         |
| Dominant               | A/C+A/A         | 1.075 (0.770–1.501) | 0.670           | 950.517 |
| Recessive              | A/A             | 1.528 (0.669–3.490) | 0.314           | 949.669 |
| Overdominant           | A/C             | 1.002 (0.707–1.420) | 0.991           | 950.699 |
| TNF-308A/G (rs1800629) |                 |                     |                 |         |
| Additive               | A               | 0.912 (0.654–1.271) | 0.586           | 950.401 |

|                              |            |                                            |                |         |
|------------------------------|------------|--------------------------------------------|----------------|---------|
| Codominant                   | A/G<br>A/A | 0.785 (0.534–1.155)<br>1.816 (0.525–6.273) | 0.219<br>0.346 | 950.099 |
| Dominant                     | A/G+A/A    | 0.838 (0.578–1.216)                        | 0.352          | 949.829 |
| Recessive                    | A/A        | 1.902 (0.552–6.557)                        | 0.309          | 949.619 |
| Overdominant                 | A/G        | 0.776 (0.528–1.141)                        | 0.197          | 949.023 |
| <b>TNF-238A/G (rs361525)</b> |            |                                            |                |         |
| Additive                     | A          | 0.709 (0.428–1.176)                        | 0.183          | 948.898 |
| Codominant                   | A/G<br>A/A | 0.741 (0.441–1.244)<br>–                   | 0.257<br>–     | 950.082 |
| Dominant                     | A/G+A/A    | 0.722 (0.431–1.209)                        | 0.215          | 949.145 |
| Recessive                    | A/A        | –                                          | –              | 949.383 |
| Overdominant                 | A/G        | 0.743 (0.443–1.248)                        | 0.262          | 949.425 |

OR: odds ratio; CI: confidence interval; AIC: Akaike information criterion; *p*-value: significance level (statistically significant when  $p < 0.05$ ).

**Table S5.** Binary logistic regression analysis of rs1800630, rs1800629, rs361525 in patients with exudative AMD and control groups.

| Model                         | Genotype/Allele | OR (95% CI)                                | <i>p</i> -Value | AIC     |
|-------------------------------|-----------------|--------------------------------------------|-----------------|---------|
| <b>TNF-863A/C (rs1800630)</b> |                 |                                            |                 |         |
| Additive                      | A               | 1.268 (0.968–1.660)                        | 0.085           | 984.183 |
| Codominant                    | A/C<br>A/A      | 1.169 (0.831–1.645)<br>1.995 (0.907–4.389) | 0.370<br>0.086  | 985.604 |
| Dominant                      | A/C+A/A         | 1.255 (0.908–1.737)                        | 0.169           | 985.293 |
| Recessive                     | A/A             | 1.912 (0.873–4.184)                        | 0.105           | 984.410 |
| Overdominant                  | A/C             | 1.125 (0.802–1.579)                        | 0.494           | 986.720 |
| <b>TNF-308A/G (rs1800629)</b> |                 |                                            |                 |         |
| Additive                      | A               | 1.217 (0.878–1.687)                        | 0.239           | 985.791 |
| Codominant                    | A/G<br>A/A      | 1.235 (0.861–1.772)<br>1.317 (0.338–5.130) | 0.251<br>0.692  | 987.754 |
| Dominant                      | A/G+A/A         | 1.240 (0.871–1.765)                        | 0.233           | 985.762 |
| Recessive                     | A/A             | 1.254 (0.323–4.872)                        | 0.743           | 989.081 |
| Overdominant                  | A/G             | 1.230 (0.858–1.763)                        | 0.260           | 985.912 |
| <b>TNF-238A/G (rs361525)</b>  |                 |                                            |                 |         |

|              |                          |                                             |                |         |
|--------------|--------------------------|---------------------------------------------|----------------|---------|
| Additive     | <b>A</b>                 | 0.734 (0.454–1.184)                         | 0.205          | 985.570 |
| Codominant   | <b>A/G</b><br><b>A/A</b> | 0.649 (0.386–1.091)<br>2.043 (0.171–24.360) | 0.103<br>0.572 | 986.134 |
| Dominant     | <b>A/G+A/A</b>           | 0.681 (0.410–1.133)                         | 0.139          | 984.985 |
| Recessive    | <b>A/A</b>               | 2.121 (0.178–25.257)                        | 0.552          | 986.813 |
| Overdominant | <b>A/G</b>               | 0.647 (0.385–1.088)                         | 0.101          | 984.471 |

OR: odds ratio; CI: confidence interval; AIC: Akaike information criterion; *p*-value: significance level (statistically significant when  $p < 0.05$ ).

**Table S6.** Haplotype association with the predisposition to early AMD occurrence.

| TNF<br>-863A/C<br>(rs1800630) | TNF<br>-308A/G<br>(rs1800629) | TNF<br>-238A/G<br>(rs361525) | Frequency |              | OR (95 % CI)     | <i>p</i> -<br>Value |
|-------------------------------|-------------------------------|------------------------------|-----------|--------------|------------------|---------------------|
|                               |                               |                              | Control   | Early<br>AMD |                  |                     |
| C                             | G                             | G                            | 0.691     | 0.706        | 1.00             | –                   |
| A                             | A                             | G                            | 0.134     | 0.137        | 0.96 (0.66–1.40) | 0.83                |
| C                             | A                             | G                            | 0.104     | 0.09         | 0.84 (0.58–1.21) | 0.35                |
| C                             | G                             | A                            | 0.056     | 0.036        | 0.70 (0.42–1.18) | 0.18                |
| A                             | G                             | G                            | 0.016     | 0.025        | 1.58 (0.66–3.78) | 0.31                |
| A                             | A                             | A                            | 0         | 0.005        | –                | –                   |

OR: odds ratio; CI: confidence interval; *p*-value: significance level (statistically significant when  $p < 0.05$ ).

**Table S7.** Distributions of rs1800630, rs1800629, rs361525 genotypes and alleles in patients with early AMD and control groups by gender.

| SNP                       | Geno-<br>types/<br>Alleles | Female                        |                                 | <i>p</i> -<br>Value | Male                          |                                 | <i>p</i> -<br>Value |
|---------------------------|----------------------------|-------------------------------|---------------------------------|---------------------|-------------------------------|---------------------------------|---------------------|
|                           |                            | Control<br>n (%)<br>(n = 222) | Early AMD<br>n (%)<br>(n = 227) |                     | Control<br>n (%)<br>(n = 133) | Early AMD<br>n (%)<br>(n = 103) |                     |
| TNF-863A/C<br>(rs1800630) | CC                         | 163 (73.4)                    | 169 (74.4)                      | 0.969               | 95 (71.4)                     | 66 (64.1)                       | 0.105               |
|                           | AC                         | 50 (22.5)                     | 49 (21.6)                       |                     | 37 (27.8)                     | 32 (31.1)                       |                     |
|                           | AA                         | 9 (4.1)                       | 9 (4.0)                         |                     | 1 (0.8)                       | 5 (4.9)                         |                     |
|                           | C                          | 376 (84.7)                    | 387 (85.2)                      | 0.815               | 227 (85.3)                    | 164 (79.6)                      | 0.102               |
|                           | A                          | 68 (15.3)                     | 67 (14.8)                       |                     | 39 (14.7)                     | 42 (20.4)                       |                     |
|                           |                            |                               |                                 |                     |                               |                                 |                     |

|                                   |        |                         |                         |       |                         |                         |       |
|-----------------------------------|--------|-------------------------|-------------------------|-------|-------------------------|-------------------------|-------|
| <b>TNF-308A/G<br/>(rs1800629)</b> | GG     | 174 (78.4)              | 185 (81.5)              | 0.280 | 103 (77.4)              | 82 (79.6)               | 0.861 |
|                                   | AG     | 46 (20.7)               | 37 (16.3)               |       | 28 (21.1)               | 19 (18.4)               |       |
|                                   | AA     | 2 (0.9)                 | 5 (2.2)                 |       | 2 (1.5)                 | 2 (1.9)                 |       |
|                                   | G<br>A | 394 (88.7)<br>50 (11.3) | 407 (89.6)<br>47 (10.4) | 0.661 | 234 (88.0)<br>32 (12.0) | 183 (88.8) 23<br>(11.2) | 0.771 |
| <b>TNF-238A/G<br/>(rs361525)</b>  | GG     | 199 (89.6)              | 207 (91.2)              | 0.550 | 117 (88.0)              | 96 (93.2)               | 0.179 |
|                                   | AG     | 22 (9.9)                | 20 (8.8)                |       | 16 (12.0)               | 7 (6.8)                 |       |
|                                   | AA     | 1 (0.5)                 | 0 (0.0)                 |       | 0 (0.0)                 | 0 (0.0)                 |       |
|                                   | G<br>A | 420 (94.6)<br>24 (5.4)  | 434 (95.6)<br>20 (4.4)  | 0.488 | 250 (94.0)<br>16 (6.0)  | 199 (96.6)<br>7 (3.4)   | 0.190 |

SNP: single nucleotide polymorphism; AMD: age-related macular degeneration; *p*-value: significance level (statistically significant when  $p < 0.05$ ).

**Table S8.** Binary logistic regression analysis of rs1800630, rs1800629, rs361525 in the early AMD and control groups by gender.

| Model                         | Genotype/Allele | OR (95 proc. CI)     | <i>p</i> -Value | AIC     |
|-------------------------------|-----------------|----------------------|-----------------|---------|
| <b>Female</b>                 |                 |                      |                 |         |
| <b>TNF-863A/C (rs1800630)</b> |                 |                      |                 |         |
| Additive                      | A               | 0.962 (0.683–1.356)  | 0.826           | 624.342 |
| Codominant                    | A/C             | 0.945 (0.603–1.481)  | 0.806           | 626.328 |
|                               | A/A             | 0.964 (0.374–2.491)  | 0.940           |         |
| Dominant                      | A/C+A/A         | 0.948 (0.622–1.445)  | 0.804           | 624.329 |
| Recessive                     | A/A             | 0.977 (0.381–2.509)  | 0.962           | 624.388 |
| Overdominant                  | A/C             | 0.947 (0.606–1.480)  | 0.811           | 624.333 |
| <b>TNF-308A/G (rs1800629)</b> |                 |                      |                 |         |
| Additive                      | A               | 0.913 (0.604–1.381)  | 0.667           | 624.206 |
| Codominant                    | A/G             | 0.757 (0.468–1.222)  | 0.254           | 623.803 |
|                               | A/A             | 2.351 (0.450–12.278) | 0.311           |         |
| Dominant                      | A/G+A/A         | 0.823 (0.518–1.308)  | 0.409           | 623.709 |
| Recessive                     | A/A             | 2.477 (0.476–12.905) | 0.281           | 623.109 |
| Overdominant                  | A/G             | 0.745 (0.462–1.203)  | 0.229           | 622.933 |
| <b>TNF-238A/G (rs361525)</b>  |                 |                      |                 |         |
| Additive                      | A               | 0.806 (0.438–1.483)  | 0.488           | 623.906 |

|                               |            |                                             |                |         |
|-------------------------------|------------|---------------------------------------------|----------------|---------|
| Codominant                    | A/G<br>A/A | 0.874 (0.463–1.651)<br>–                    | 0.678<br>–     | 624.807 |
| Dominant                      | A/G+A/A    | 0.836 (0.445–1.570)                         | 0.577          | 624.079 |
| Recessive                     | A/A        | –                                           | –              | –       |
| Overdominant                  | A/G        | 0.878 (0.465–1.659)                         | 0.689          | 624.230 |
| <b>Male</b>                   |            |                                             |                |         |
| <b>TNF-863A/C (rs1800630)</b> |            |                                             |                |         |
| Additive                      | A          | 1.512 (0.925–2.470)                         | 0.099          | 322.597 |
| Codominant                    | A/C<br>A/A | 1.245 (0.705–2.197)<br>7.197 (0.822–63.026) | 0.450<br>0.075 | 322.640 |
| Dominant                      | A/C+A/A    | 1.402 (0.808–2.432)                         | 0.230          | 323.900 |
| Recessive                     | A/A        | 6.735 (0.774–58.566)                        | 0.084          | 321.210 |
| Overdominant                  | A/C        | 1.169 (0.665–2.055)                         | 0.587          | 325.046 |
| <b>TNF-308A/G (rs1800629)</b> |            |                                             |                |         |
| Additive                      | A          | 0.921 (0.526–1.614)                         | 0.775          | 325.260 |
| Codominant                    | A/G<br>A/A | 0.852 (0.445–1.634)<br>1.256 (0.173–9.110)  | 0.630<br>0.822 | 327.042 |
| Dominant                      | A/G+A/A    | 0.879 (0.469–1.649)                         | 0.688          | 325.180 |
| Recessive                     | A/A        | 1.297 (0.180–9.367)                         | 0.797          | 325.275 |
| Overdominant                  | A/G        | 0.848 (0.443–1.624)                         | 0.619          | 325.093 |
| <b>TNF-238A/G (rs361525)</b>  |            |                                             |                |         |
| Additive                      | A          | 0.533 (0.211–1.349)                         | 0.184          | 323.474 |
| Codominant                    | A/G<br>A/A | 0.533 (0.211–1.349)<br>–                    | 0.184<br>–     | 325.474 |
| Dominant                      | A/G+A/A    | 0.533 (0.211–1.349)                         | 0.184          | 323.474 |
| Recessive                     | A/A        | –                                           | –              | –       |
| Overdominant                  | A/G        | 0.533 (0.211–1.349)                         | 0.184          | 323.474 |

OR: odds ratio; CI: confidence interval; AIC: Akaike information criteria; *p*-value: significance level (statistically significant when  $p < 0.05$ ).

**Table S9.** Binary logistic regression analysis of rs1800630, rs1800629, rs361525 in exudative AMD and control groups by gender.

| Model | Genotype/Allele | OR (95 proc. CI) | <i>p</i> -Value | AIC |
|-------|-----------------|------------------|-----------------|-----|
|-------|-----------------|------------------|-----------------|-----|

| Female                 |            |                                             |                |         |
|------------------------|------------|---------------------------------------------|----------------|---------|
| TNF-863A/C (rs1800630) |            |                                             |                |         |
| Additive               | A          | 1.288 (0.919–1.803)                         | 0.141          | 607.226 |
| Codominant             | A/C<br>A/A | 1.411 (0.908–2.191)<br>1.364 (0.558–3.334)  | 0.126<br>0.496 | 608.827 |
| Dominant               | A/C+A/A    | 1.403 (0.927–2.123)                         | 0.109          | 604.832 |
| Recessive              | A/A        | 1.240 (0.511–3.008)                         | 0.634          | 609.190 |
| Overdominant           | A/C        | 1.381 (0.893–2.138)                         | 0.147          | 607.299 |
| TNF-308A/G (rs1800629) |            |                                             |                |         |
| Additive               | A          | 1.304 (0.847–2.007)                         | 0.228          | 607.948 |
| Codominant             | A/G<br>A/A | 1.390 (0.875–2.207)<br>0.818 (0.102–6.531)  | 0.163<br>0.850 | 609.387 |
| Dominant               | A/G+A/A    | 1.363 (0.864–2.148)                         | 0.183          | 607.629 |
| Recessive              | A/A        | 0.762 (0.096–6.044)                         | 0.797          | 609.353 |
| Overdominant           | A/G        | 1.393 (0.878–2.210)                         | 0.160          | 607.423 |
| TNF-238A/G (rs361525)  |            |                                             |                |         |
| Additive               | A          | 0.761 (0.401–1.442)                         | 0.402          | 608.712 |
| Codominant             | A/G<br>A/A | 0.797 (0.411–1.542)<br>–                    | 0.500<br>–     | 610.218 |
| Dominant               | A/G+A/A    | 0.775 (0.403–1.492)                         | 0.446          | 608.837 |
| Recessive              | A/A        | –                                           | –              | 608.673 |
| Overdominant           | A/G        | 0.799 (0.413–1.547)                         | 0.506          | 608.976 |
| Male                   |            |                                             |                |         |
| TNF-863A/C (rs1800630) |            |                                             |                |         |
| Additive               | A          | 1.173 (0.741–1.857)                         | 0.495          | 375.241 |
| Codominant             | A/C<br>A/A | 0.835 (0.480–1.452)<br>7.129 (0.854–59.491) | 0.523<br>0.070 | 372.042 |
| Dominant               | A/C+A/A    | 0.995 (0.585–1.692)                         | 0.985          | 375.709 |
| Recessive              | A/A        | 7.481 (0.901–62.117)                        | 0.062          | 370.452 |
| Overdominant           | A/C        | 0.786 (0.453–1.362)                         | 0.390          | 374.970 |
| TNF-308A/G (rs1800629) |            |                                             |                |         |
| Additive               | A          | 1.108 (0.668–1.837)                         | 0.691          | 375.551 |

|                              |                    |                                             |                |         |
|------------------------------|--------------------|---------------------------------------------|----------------|---------|
| Codominant                   | <b>A/G<br/>A/A</b> | 1.042 (0.580–1.870)<br>1.679 (0.272–10.382) | 0.891<br>0.577 | 377.382 |
| Dominant                     | <b>A/G+A/A</b>     | 1.081 (0.613–1.906)                         | 0.787          | 375.636 |
| Recessive                    | <b>A/A</b>         | 1.664 (0.270–10.243)                        | 0.583          | 375.401 |
| Overdominant                 | <b>A/G</b>         | 1.029 (0.574–1.844)                         | 0.923          | 375.700 |
| <b>TNF-238A/G (rs361525)</b> |                    |                                             |                |         |
| Additive                     | <b>A</b>           | 0.739 (0.356–1.532)                         | 0.416          | 375.042 |
| Codominant                   | <b>A/G<br/>A/A</b> | 0.482 (0.203–1.144)<br>–                    | 0.098<br>–     | 372.360 |
| Dominant                     | <b>A/G+A/A</b>     | 0.588 (0.260–1.330)                         | 0.202          | 374.053 |
| Recessive                    | <b>A/A</b>         | –                                           | –              | –       |
| Overdominant                 | <b>A/G</b>         | 0.474 (0.200–1.125)                         | 0.090          | 372.719 |

OR: odds ratio; CI: confidence interval; AIC: Akaike information criteria; p-value: significance level (statistically significant when  $p < 0.05$ ).

**Table S10.** Serum TNF- $\alpha$  levels in relation to the genotypes of *TNF- $\alpha$*  polymorphisms.

| <b>Model</b>                  |                    | <b>All Subjects<br/>(pg/mL),<br/>Median<br/>(IQR)</b> | <b><i>p</i>-Value</b> | <b>Exudative<br/>AMD<br/>(pg/mL),<br/>median<br/>(IQR)</b> | <b><i>p</i>-Value</b> | <b>Control<br/>Group<br/>(pg/mL),<br/>Median<br/>(IQR)</b> | <b><i>p</i>-Value</b> |
|-------------------------------|--------------------|-------------------------------------------------------|-----------------------|------------------------------------------------------------|-----------------------|------------------------------------------------------------|-----------------------|
| <b>TNF-863A/C (rs1800630)</b> |                    |                                                       |                       |                                                            |                       |                                                            |                       |
| Dominant                      | AC+AA<br>vs.<br>CC | 23.51 (12.25)<br>vs.<br>23.91 (8.49)                  | 0.908                 | 15.43 (7.45)<br>vs.<br>16.56 (5.63)                        | 0.724                 | 33.21 (9.52)<br>vs.<br>29.8 (5.03)                         | 0.309                 |
| <b>TNF-308A/G (rs1800629)</b> |                    |                                                       |                       |                                                            |                       |                                                            |                       |
| Dominant                      | AG+AA<br>vs.<br>GG | 21.69 (8.35)<br>vs.<br>24.19 (9.83)                   | 0.563                 | 16.69 (3.88)<br>vs.<br>16.04 (6.71)                        | 0.858                 | 31.7 (1.64)<br>vs.<br>30.54 (6.66)                         | 0.812                 |
| <b>TNF-238A/G (rs361525)</b>  |                    |                                                       |                       |                                                            |                       |                                                            |                       |
| Dominant                      | AG+AA<br>vs.<br>GG | 18.6 (5.6)<br>vs.<br>24.24 (9.74)                     | 0.333                 | 17.12 (7.04)<br>vs.<br>16.07 (6.22)                        | 0.825                 | – (–)<br>vs.<br>31.13 (6.11)                               | –                     |

*p*-value: significance level (statistically significant when  $p < 0.05$ ).
